# Supplementary material for: An Improved Method for Quick Quantification of Unsaturated Transferrin
Source: MDPI journal article supplement (doi:10.3390/bios12090708), 2022-09-01
Supplement: s1 [file s1]

# Supporting Information

**Title:** An Improved Method for Quick Quantification of Unsaturated Transferrin

**Authors:** Ruirui Guo, Juanjuan Gao, Lingyun Hui, Yanqing Li, Junhui Liu, Yao Fu, Lei Shi, Yawen Wang and Bing Liu

## Contents:

|                                                                             |    |
|-----------------------------------------------------------------------------|----|
| Supporting Information.....                                                 | 1  |
| Figure S1. Determination of the concentration of MTC used in the test ..... | 2  |
| Figure S2. Distribution of MTC in different disease groups.....             | 3  |
| Figure S3. Distribution of UIBC in different disease groups .....           | 4  |
| Figure S4. Systemic comparison between MTC and UIBC .....                   | 5  |
| Figure S5. MTC reaction colors.....                                         | 11 |

**Figure S1. Determination of the concentration of MTC used in the test.**

2  $\mu$ l of MTC at 0.5 mM, 1mM or 2 mM was added to 98  $\mu$ l of plasma at 10X, 20X 50X or 100X dilution in each reaction. The criteria for choosing the concentration are to minimize the usage of MTC while keeping the color appealing to naked eyes. The arrow indicates the 2 mM of MTC and 50 times diluted plasma was chosen for the reaction.

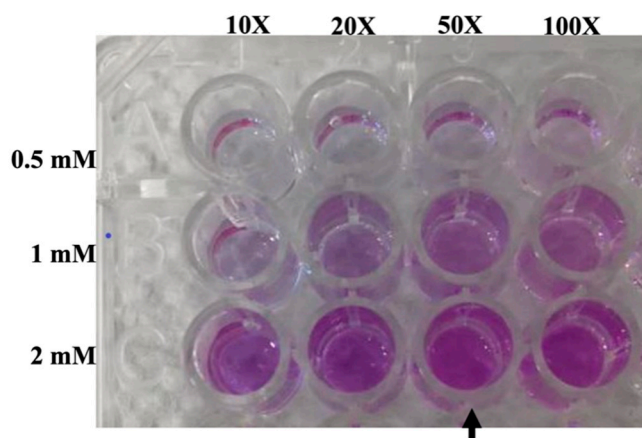

**Figure S2. Distribution of MTC in different disease groups.**

**a: Comparisons of MTC in different disease groups.**

| Reference group | Comparison group | <i>P</i> <sup>a</sup> |
|-----------------|------------------|-----------------------|
| Normal          | Diabetes         | 0.186                 |
| Normal          | Lung cancer      | <0.001                |
| Normal          | GI cancer        | <0.001                |
| Normal          | Hepatic cancer   | <0.001                |
| Hepatic cancer  | Diabetes         | <0.001                |
| Hepatic cancer  | Lung cancer      | <0.001                |
| Hepatic cancer  | GI cancer        | <0.001                |
| Lung cancer     | Diabetes         | <0.001                |
| Lung cancer     | GI cancer        | 0.084                 |
| GI cancer       | Diabetes         | <0.001                |

<sup>a</sup> Multiple comparison between two groups were performed by Games-Howell test.

**b: Distribution of different diseases among four quartile intervals of MTC.**

| Disease group  | MTC, n (%)       |                    |                    |                  | <i>P</i> <sup>b</sup> |
|----------------|------------------|--------------------|--------------------|------------------|-----------------------|
|                | ≤Q1 <sup>a</sup> | Q1-Q2 <sup>a</sup> | Q2-Q3 <sup>a</sup> | >Q3 <sup>a</sup> |                       |
| Normal         | 37 (61.7)        | 17 (28.3)          | 5 (8.3)            | 1 (1.7)          | -                     |
| Diabetes       | 21 (70.0)        | 7 (23.3)           | 2 (6.7)            | 0 (0.0)          | 0.883                 |
| Lung cancer    | 2 (6.7)          | 11 (36.7)          | 12 (40.0)          | 5 (16.7)         | <0.001                |
| GI cancer      | 5 (16.7)         | 13 (43.3)          | 10 (33.3)          | 2 (6.7)          | <0.001                |
| Hepatic cancer | 2 (1.7)          | 20 (16.7)          | 39 (32.5)          | 59 (49.2)        | <0.001                |

<sup>a</sup> Q1, Q2 and Q3 represent the first (33.296), second (41.767) and third quartile (51.783) of MTC, respectively.

<sup>b</sup> Fisher's exact test was used for comparisons between each disease group and the normal group.

**Figure S3. Distribution of UIBC in different disease groups.**

**a: Comparisons of UIBC in different disease groups.**

| Reference group | Comparison group | <i>P</i> <sup>a</sup> |
|-----------------|------------------|-----------------------|
| Normal          | Diabetes         | 0.595                 |
| Normal          | Lung cancer      | <b>0.006</b>          |
| Normal          | GI cancer        | 0.779                 |
| Normal          | Hepatic disease  | <b>0.001</b>          |
| Hepatic cancer  | Diabetes         | 0.061                 |
| Hepatic cancer  | Lung cancer      | >0.999                |
| Hepatic cancer  | GI cancer        | 0.183                 |
| Lung cancer     | Diabetes         | 0.178                 |
| Lung cancer     | GI cancer        | 0.309                 |
| GI cancer       | Diabetes         | >0.999                |

<sup>a</sup> Multiple comparison between two groups were performed by Games-Howell test.

**b: Distribution of different diseases among four quartile intervals of UIBC.**

| Disease group  | UIBC, n (%)      |                    |                    |                  | <i>P</i> <sup>b</sup> |
|----------------|------------------|--------------------|--------------------|------------------|-----------------------|
|                | ≤Q1 <sup>a</sup> | Q1-Q2 <sup>a</sup> | Q2-Q3 <sup>a</sup> | >Q3 <sup>a</sup> |                       |
| Normal         | 2 (3.3)          | 22 (36.7)          | 16 (26.7)          | 20 (33.3)        | -                     |
| Diabetes       | 4 (13.3)         | 8 (26.7)           | 10 (33.3)          | 8 (26.7)         | 0.260                 |
| Lung cancer    | 11 (36.7)        | 6 (20.0)           | 8 (26.7)           | 5 (16.7)         | <b>&lt;0.001</b>      |
| GI cancer      | 5 (17.2)         | 7 (24.1)           | 11 (37.9)          | 6 (20.7)         | 0.060                 |
| Hepatic cancer | 44 (38.6)        | 23 (20.2)          | 20 (17.5)          | 27 (23.7)        | <b>&lt;0.001</b>      |

<sup>a</sup> Q1, Q2 and Q3 represent the first (19.369), second (27.287) and third quartile (36.057) of UIBC, respectively.

<sup>b</sup> Fisher's exact test was used for comparisons between each disease group and the normal group.

**Figure S4. Systemic comparison between MTC and UIBC.**

| <b>ID</b> | <b>Group</b> | <b>OD<sub>660</sub></b> | <b>MTC</b> | <b>UIBC</b> |
|-----------|--------------|-------------------------|------------|-------------|
| 1         | Normal       | 1.021                   | 29.067     | 23.014      |
| 2         | Normal       | 1.007                   | 28.350     | 31.635      |
| 3         | Normal       | 0.997                   | 27.833     | 25.712      |
| 4         | Normal       | 1.101                   | 33.067     | 38.381      |
| 5         | Normal       | 0.929                   | 24.450     | 29.086      |
| 6         | Normal       | 1.106                   | 33.283     | 36.057      |
| 7         | Normal       | 1.144                   | 35.183     | 22.789      |
| 8         | Normal       | 0.868                   | 21.383     | 26.312      |
| 9         | Normal       | 0.943                   | 25.133     | 49.326      |
| 10        | Normal       | 0.891                   | 22.550     | 29.910      |
| 11        | Normal       | 0.880                   | 22.000     | 19.790      |
| 12        | Normal       | 1.097                   | 32.833     | 21.140      |
| 13        | Normal       | 1.208                   | 38.417     | 25.787      |
| 14        | Normal       | 0.861                   | 21.050     | 21.365      |
| 15        | Normal       | 1.060                   | 31.017     | 15.218      |
| 16        | Normal       | 0.965                   | 26.250     | 34.408      |
| 17        | Normal       | 1.293                   | 42.633     | 33.734      |
| 18        | Normal       | 0.885                   | 22.233     | 32.159      |
| 19        | Normal       | 1.133                   | 34.633     | 51.425      |
| 20        | Normal       | 1.127                   | 34.333     | 23.239      |
| 21        | Normal       | 1.021                   | 29.067     | 37.182      |
| 22        | Normal       | 1.119                   | 33.950     | 30.435      |
| 23        | Normal       | 0.947                   | 25.350     | 22.264      |
| 24        | Normal       | 1.068                   | 31.400     | 36.282      |
| 25        | Normal       | 1.112                   | 33.600     | 19.041      |
| 26        | Normal       | 1.327                   | 44.367     | 29.461      |
| 27        | Normal       | 1.077                   | 31.833     | 26.462      |
| 28        | Normal       | 1.140                   | 35.017     | 28.711      |
| 29        | Normal       | 1.055                   | 30.733     | 66.343      |
| 30        | Normal       | 0.997                   | 27.833     | 26.237      |
| 31        | Normal       | 1.059                   | 30.933     | 36.282      |
| 32        | Normal       | 0.959                   | 25.967     | 25.937      |
| 33        | Normal       | 0.929                   | 24.450     | 36.282      |
| 34        | Normal       | 1.033                   | 29.650     | 39.431      |
| 35        | Normal       | 0.936                   | 24.800     | 28.486      |
| 36        | Normal       | 1.036                   | 29.800     | 28.711      |
| 37        | Normal       | 1.112                   | 33.600     | 66.642      |
| 38        | Normal       | 0.983                   | 27.133     | 37.707      |
| 39        | Normal       | 1.196                   | 37.800     | 29.910      |
| 40        | Normal       | 1.106                   | 33.300     | 58.546      |
| 41        | Normal       | 1.290                   | 42.500     | 26.987      |
| 42        | Normal       | 1.005                   | 28.233     | 47.677      |
| 43        | Normal       | 1.319                   | 43.933     | 57.647      |
| 44        | Normal       | 1.015                   | 28.767     | 34.783      |
| 45        | Normal       | 1.148                   | 35.400     | 26.612      |
| 46        | Normal       | 1.435                   | 49.750     | 36.882      |
| 47        | Normal       | 1.127                   | 34.350     | 22.414      |

|    |           |       |        |        |
|----|-----------|-------|--------|--------|
| 48 | Normal    | 1.206 | 38.300 | 43.629 |
| 49 | Normal    | 1.253 | 40.667 | 27.287 |
| 50 | Normal    | 0.978 | 26.883 | 26.387 |
| 51 | Normal    | 1.093 | 32.667 | 43.104 |
| 52 | Normal    | 1.075 | 31.767 | 27.137 |
| 53 | Normal    | 1.086 | 32.283 | 33.958 |
| 54 | Normal    | 1.166 | 36.283 | 28.336 |
| 55 | Normal    | 1.489 | 52.450 | 23.763 |
| 56 | Normal    | 1.275 | 41.750 | 24.813 |
| 57 | Normal    | 1.142 | 35.117 | 41.080 |
| 58 | Normal    | 1.078 | 31.883 | 28.111 |
| 59 | Normal    | 1.084 | 32.200 | 27.062 |
| 60 | Normal    | 0.726 | 14.283 | 87.108 |
| 61 | GI cancer | 1.505 | 53.267 | 41.803 |
| 62 | GI cancer | 1.023 | 29.167 | 28.791 |
| 63 | GI cancer | 1.279 | 41.967 | 31.558 |
| 64 | GI cancer | 1.183 | 37.167 | 13.909 |
| 65 | GI cancer | 1.072 | 31.583 | NA*    |
| 66 | GI cancer | 1.491 | 52.550 | 17.349 |
| 67 | GI cancer | 1.132 | 34.600 | 21.163 |
| 68 | GI cancer | 1.322 | 44.083 | 44.346 |
| 69 | GI cancer | 1.112 | 33.617 | 52.347 |
| 70 | GI cancer | 1.296 | 42.817 | 27.370 |
| 71 | GI cancer | 1.129 | 34.467 | 35.746 |
| 72 | GI cancer | 1.253 | 40.633 | 31.259 |
| 73 | GI cancer | 1.161 | 36.033 | 31.109 |
| 74 | GI cancer | 1.299 | 42.967 | 19.369 |
| 75 | GI cancer | 1.103 | 33.133 | 21.911 |
| 76 | GI cancer | 0.979 | 26.950 | 33.951 |
| 77 | GI cancer | 1.164 | 36.183 | 24.603 |
| 78 | GI cancer | 1.137 | 34.850 | 20.116 |
| 79 | GI cancer | 1.377 | 46.867 | 37.167 |
| 80 | GI cancer | 1.392 | 47.583 | 31.109 |
| 81 | GI cancer | 1.433 | 49.650 | 67.304 |
| 82 | GI cancer | 1.346 | 45.283 | 16.228 |
| 83 | GI cancer | 1.130 | 34.517 | 19.369 |
| 84 | GI cancer | 1.228 | 39.383 | 33.951 |
| 85 | GI cancer | 1.308 | 43.400 | 31.782 |
| 86 | GI cancer | 1.083 | 32.150 | 19.892 |
| 87 | GI cancer | 1.187 | 37.333 | 24.528 |
| 88 | GI cancer | 1.223 | 39.133 | 23.108 |
| 89 | GI cancer | 1.212 | 38.617 | 48.833 |
| 90 | GI cancer | 1.408 | 48.383 | 31.334 |
| 91 | Diabetes  | 0.819 | 18.950 | 24.813 |
| 92 | Diabetes  | 0.774 | 16.717 | 33.584 |
| 93 | Diabetes  | 0.781 | 17.050 | 22.939 |
| 94 | Diabetes  | 0.926 | 24.317 | 24.963 |
| 95 | Diabetes  | 0.966 | 26.300 | 41.605 |
| 96 | Diabetes  | 0.791 | 17.567 | 32.759 |
| 97 | Diabetes  | 0.727 | 14.333 | 27.362 |
| 98 | Diabetes  | 0.708 | 13.417 | 26.087 |

|     |             |       |        |        |
|-----|-------------|-------|--------|--------|
| 99  | Diabetes    | 0.767 | 16.350 | 35.383 |
| 100 | Diabetes    | 0.698 | 12.900 | 32.609 |
| 101 | Diabetes    | 0.983 | 27.150 | 17.616 |
| 102 | Diabetes    | 0.916 | 23.817 | 36.432 |
| 103 | Diabetes    | 0.941 | 25.033 | 15.892 |
| 104 | Diabetes    | 0.985 | 27.267 | 19.266 |
| 105 | Diabetes    | 1.056 | 30.817 | 39.731 |
| 106 | Diabetes    | 1.180 | 37.000 | 27.287 |
| 107 | Diabetes    | 0.983 | 27.133 | 36.132 |
| 108 | Diabetes    | 0.890 | 22.517 | 42.654 |
| 109 | Diabetes    | 1.053 | 30.633 | 25.637 |
| 110 | Diabetes    | 1.042 | 30.117 | 21.290 |
| 111 | Diabetes    | 1.151 | 35.567 | 16.267 |
| 112 | Diabetes    | 1.168 | 36.417 | 38.156 |
| 113 | Diabetes    | 1.118 | 33.883 | 29.086 |
| 114 | Diabetes    | 1.038 | 29.900 | 22.414 |
| 115 | Diabetes    | 1.183 | 37.150 | 50.450 |
| 116 | Diabetes    | 1.378 | 46.883 | 27.961 |
| 117 | Diabetes    | 1.273 | 41.650 | 44.004 |
| 118 | Diabetes    | 1.276 | 41.783 | 29.985 |
| 119 | Diabetes    | 1.206 | 38.283 | 35.008 |
| 120 | Diabetes    | 1.016 | 28.817 | 29.760 |
| 121 | Lung cancer | 1.321 | 44.050 | 18.695 |
| 122 | Lung cancer | 1.342 | 45.100 | 27.520 |
| 123 | Lung cancer | 1.296 | 42.783 | 22.061 |
| 124 | Lung cancer | 1.469 | 51.467 | 14.657 |
| 125 | Lung cancer | 1.263 | 41.133 | 13.760 |
| 126 | Lung cancer | 1.453 | 50.650 | 25.575 |
| 127 | Lung cancer | 1.231 | 39.533 | 15.704 |
| 128 | Lung cancer | 1.587 | 57.350 | 25.351 |
| 129 | Lung cancer | 1.336 | 44.817 | 36.120 |
| 130 | Lung cancer | 1.237 | 39.867 | 31.109 |
| 131 | Lung cancer | 1.164 | 36.200 | 39.709 |
| 132 | Lung cancer | 1.253 | 40.667 | 18.247 |
| 133 | Lung cancer | 1.322 | 44.100 | 17.723 |
| 134 | Lung cancer | 1.516 | 53.800 | 27.146 |
| 135 | Lung cancer | 1.251 | 40.533 | 29.389 |
| 136 | Lung cancer | 1.395 | 47.733 | 21.238 |
| 137 | Lung cancer | 1.144 | 35.217 | 38.064 |
| 138 | Lung cancer | 1.274 | 41.683 | 38.214 |
| 139 | Lung cancer | 1.425 | 49.250 | 18.396 |
| 140 | Lung cancer | 1.797 | 67.850 | 8.600  |
| 141 | Lung cancer | 1.201 | 38.033 | 11.516 |
| 142 | Lung cancer | 1.574 | 56.700 | 29.913 |
| 143 | Lung cancer | 1.488 | 52.400 | 2.169  |
| 144 | Lung cancer | 1.254 | 40.717 | 35.746 |
| 145 | Lung cancer | 1.050 | 30.500 | 35.821 |
| 146 | Lung cancer | 1.429 | 49.467 | 39.859 |
| 147 | Lung cancer | 1.297 | 42.867 | 16.452 |
| 148 | Lung cancer | 1.340 | 45.000 | 34.250 |
| 149 | Lung cancer | 1.046 | 30.317 | 29.763 |

|     |                |       |        |        |
|-----|----------------|-------|--------|--------|
| 150 | Lung cancer    | 1.223 | 39.150 | 21.313 |
| 151 | Hepatic cancer | 1.195 | 37.750 | 23.275 |
| 152 | Hepatic cancer | 1.667 | 61.350 | 24.476 |
| 153 | Hepatic cancer | 1.500 | 53.000 | NA     |
| 154 | Hepatic cancer | 1.579 | 56.933 | 8.859  |
| 155 | Hepatic cancer | 1.427 | 49.350 | 12.388 |
| 156 | Hepatic cancer | 1.380 | 47.017 | 55.184 |
| 157 | Hepatic cancer | 1.769 | 66.433 | 19.220 |
| 158 | Hepatic cancer | 1.589 | 57.450 | 36.789 |
| 159 | Hepatic cancer | 1.600 | 58.000 | 20.647 |
| 160 | Hepatic cancer | 1.160 | 35.983 | 28.755 |
| 161 | Hepatic cancer | 1.639 | 59.967 | 13.214 |
| 162 | Hepatic cancer | 1.544 | 55.217 | 31.609 |
| 163 | Hepatic cancer | 1.806 | 68.317 | 31.909 |
| 164 | Hepatic cancer | 1.449 | 50.467 | 14.716 |
| 165 | Hepatic cancer | 1.200 | 38.017 | 13.589 |
| 166 | Hepatic cancer | 1.683 | 62.150 | 4.355  |
| 167 | Hepatic cancer | 1.858 | 70.917 | NA     |
| 168 | Hepatic cancer | 1.539 | 54.933 | 47.751 |
| 169 | Hepatic cancer | 1.532 | 54.617 | 6.907  |
| 170 | Hepatic cancer | 1.264 | 41.200 | 22.148 |
| 171 | Hepatic cancer | 1.666 | 61.317 | 9.385  |
| 172 | Hepatic cancer | 1.432 | 49.617 | 5.556  |
| 173 | Hepatic cancer | 1.665 | 61.233 | 35.438 |
| 174 | Hepatic cancer | 1.238 | 39.900 | 32.660 |
| 175 | Hepatic cancer | 1.240 | 40.000 | 41.444 |
| 176 | Hepatic cancer | 2.132 | 84.600 | 27.779 |
| 177 | Hepatic cancer | 1.846 | 70.317 | 7.283  |
| 178 | Hepatic cancer | 1.765 | 66.250 | 35.663 |
| 179 | Hepatic cancer | 1.405 | 48.267 | 20.722 |
| 180 | Hepatic cancer | 1.129 | 34.433 | 36.339 |
| 181 | Hepatic cancer | 1.377 | 46.850 | 19.596 |
| 182 | Hepatic cancer | 1.282 | 42.083 | 26.879 |
| 183 | Hepatic cancer | 1.535 | 54.733 | 37.089 |
| 184 | Hepatic cancer | 1.449 | 50.450 | 0.450  |
| 185 | Hepatic cancer | 1.220 | 39.017 | 27.629 |
| 186 | Hepatic cancer | 1.322 | 44.100 | 20.572 |
| 187 | Hepatic cancer | 1.932 | 74.617 | 13.589 |
| 188 | Hepatic cancer | 1.606 | 58.300 | 57.661 |
| 189 | Hepatic cancer | 1.410 | 48.517 | 9.535  |
| 190 | Hepatic cancer | 1.640 | 60.000 | 49.402 |
| 191 | Hepatic cancer | 1.461 | 51.050 | 16.518 |
| 192 | Hepatic cancer | 1.471 | 51.533 | 41.219 |
| 193 | Hepatic cancer | 1.574 | 56.700 | 42.420 |
| 194 | Hepatic cancer | 1.076 | 31.817 | 47.600 |
| 195 | Hepatic cancer | 1.673 | 61.667 | NA     |
| 196 | Hepatic cancer | 1.487 | 52.333 | 10.436 |
| 197 | Hepatic cancer | 1.478 | 51.883 | 28.380 |
| 198 | Hepatic cancer | 1.512 | 53.617 | 36.263 |
| 199 | Hepatic cancer | 1.422 | 49.117 | 24.326 |
| 200 | Hepatic cancer | 1.285 | 42.250 | 28.080 |



|     |                |       |        |        |
|-----|----------------|-------|--------|--------|
| 201 | Hepatic cancer | 1.371 | 46.567 | 44.898 |
| 202 | Hepatic cancer | 1.516 | 53.817 | 30.933 |
| 203 | Hepatic cancer | 1.706 | 63.317 | 31.233 |
| 204 | Hepatic cancer | 1.766 | 66.283 | 25.527 |
| 205 | Hepatic cancer | 1.567 | 56.367 | 18.019 |
| 206 | Hepatic cancer | 1.234 | 39.717 | 49.778 |
| 207 | Hepatic cancer | 1.223 | 39.133 | 18.845 |
| 208 | Hepatic cancer | 1.465 | 51.250 | NA     |
| 209 | Hepatic cancer | 1.454 | 50.700 | 0.225  |
| 210 | Hepatic cancer | 1.663 | 61.167 | 3.304  |
| 211 | Hepatic cancer | 1.357 | 45.850 | 1.201  |
| 212 | Hepatic cancer | 1.678 | 61.883 | 39.041 |
| 213 | Hepatic cancer | 1.276 | 41.783 | 10.736 |
| 214 | Hepatic cancer | 1.659 | 60.950 | 24.926 |
| 215 | Hepatic cancer | 1.196 | 37.800 | 31.083 |
| 216 | Hepatic cancer | 1.766 | 66.317 | 52.856 |
| 217 | Hepatic cancer | 1.429 | 49.467 | 43.171 |
| 218 | Hepatic cancer | 1.403 | 48.133 | 22.224 |
| 219 | Hepatic cancer | 1.164 | 36.200 | 31.834 |
| 220 | Hepatic cancer | 1.563 | 56.150 | 21.698 |
| 221 | Hepatic cancer | 1.436 | 49.800 | 42.645 |
| 222 | Hepatic cancer | 1.768 | 66.400 | 26.879 |
| 223 | Hepatic cancer | 1.433 | 49.650 | 24.476 |
| 224 | Hepatic cancer | 1.230 | 39.500 | 24.401 |
| 225 | Hepatic cancer | 1.411 | 48.567 | 46.399 |
| 226 | Hepatic cancer | 1.639 | 59.950 | 22.674 |
| 227 | Hepatic cancer | 1.276 | 41.783 | 37.089 |
| 228 | Hepatic cancer | 1.643 | 60.150 | 39.942 |
| 229 | Hepatic cancer | 1.634 | 59.683 | 14.040 |
| 230 | Hepatic cancer | 1.907 | 73.367 | 14.190 |
| 231 | Hepatic cancer | 1.596 | 57.817 | 16.142 |
| 232 | Hepatic cancer | 1.836 | 69.783 | 0.375  |
| 233 | Hepatic cancer | 1.807 | 68.367 | 24.476 |
| 234 | Hepatic cancer | 1.855 | 70.733 | 7.733  |
| 235 | Hepatic cancer | 1.751 | 65.533 | 0.751  |
| 236 | Hepatic cancer | 1.746 | 65.317 | NA     |
| 237 | Hepatic cancer | 1.982 | 77.083 | 14.190 |
| 238 | Hepatic cancer | 1.408 | 48.417 | 7.057  |
| 239 | Hepatic cancer | 1.384 | 47.183 | 42.795 |
| 240 | Hepatic cancer | 1.903 | 73.167 | 52.406 |
| 241 | Hepatic cancer | 1.849 | 70.450 | 0.450  |
| 242 | Hepatic cancer | 1.475 | 51.750 | 24.251 |
| 243 | Hepatic cancer | 1.741 | 65.067 | NA     |
| 244 | Hepatic cancer | 1.440 | 49.983 | 32.134 |
| 245 | Hepatic cancer | 1.140 | 35.000 | 48.201 |
| 246 | Hepatic cancer | 0.995 | 27.767 | 16.442 |
| 247 | Hepatic cancer | 1.236 | 39.800 | 20.947 |
| 248 | Hepatic cancer | 1.441 | 50.050 | 18.845 |
| 249 | Hepatic cancer | 1.378 | 46.900 | 15.466 |
| 250 | Hepatic cancer | 1.134 | 34.683 | 16.142 |
| 251 | Hepatic cancer | 1.403 | 48.150 | 27.029 |

|     |                |       |        |        |
|-----|----------------|-------|--------|--------|
| 252 | Hepatic cancer | 1.255 | 40.767 | 37.465 |
| 253 | Hepatic cancer | 1.756 | 65.800 | 4.655  |
| 254 | Hepatic cancer | 1.752 | 65.600 | 1.126  |
| 255 | Hepatic cancer | 1.354 | 45.700 | 17.569 |
| 256 | Hepatic cancer | 1.210 | 38.517 | 34.161 |
| 257 | Hepatic cancer | 1.478 | 51.883 | 9.085  |
| 258 | Hepatic cancer | 2.123 | 84.150 | 5.105  |
| 259 | Hepatic cancer | 1.605 | 58.267 | 42.870 |
| 260 | Hepatic cancer | 1.113 | 33.633 | 26.278 |
| 261 | Hepatic cancer | 1.455 | 50.767 | 1.952  |
| 262 | Hepatic cancer | 1.331 | 44.567 | 1.727  |
| 263 | Hepatic cancer | 1.424 | 49.200 | 33.035 |
| 264 | Hepatic cancer | 1.144 | 35.200 | 12.989 |
| 265 | Hepatic cancer | 1.501 | 53.050 | 29.656 |
| 266 | Hepatic cancer | 1.284 | 42.200 | 30.482 |
| 267 | Hepatic cancer | 1.655 | 60.750 | 25.527 |
| 268 | Hepatic cancer | 1.639 | 59.950 | 27.479 |
| 269 | Hepatic cancer | 1.385 | 47.233 | 58.712 |
| 270 | Hepatic cancer | 1.337 | 44.850 | 12.538 |

NA\* = negative reading.

Figure S5. MTC reaction colors.

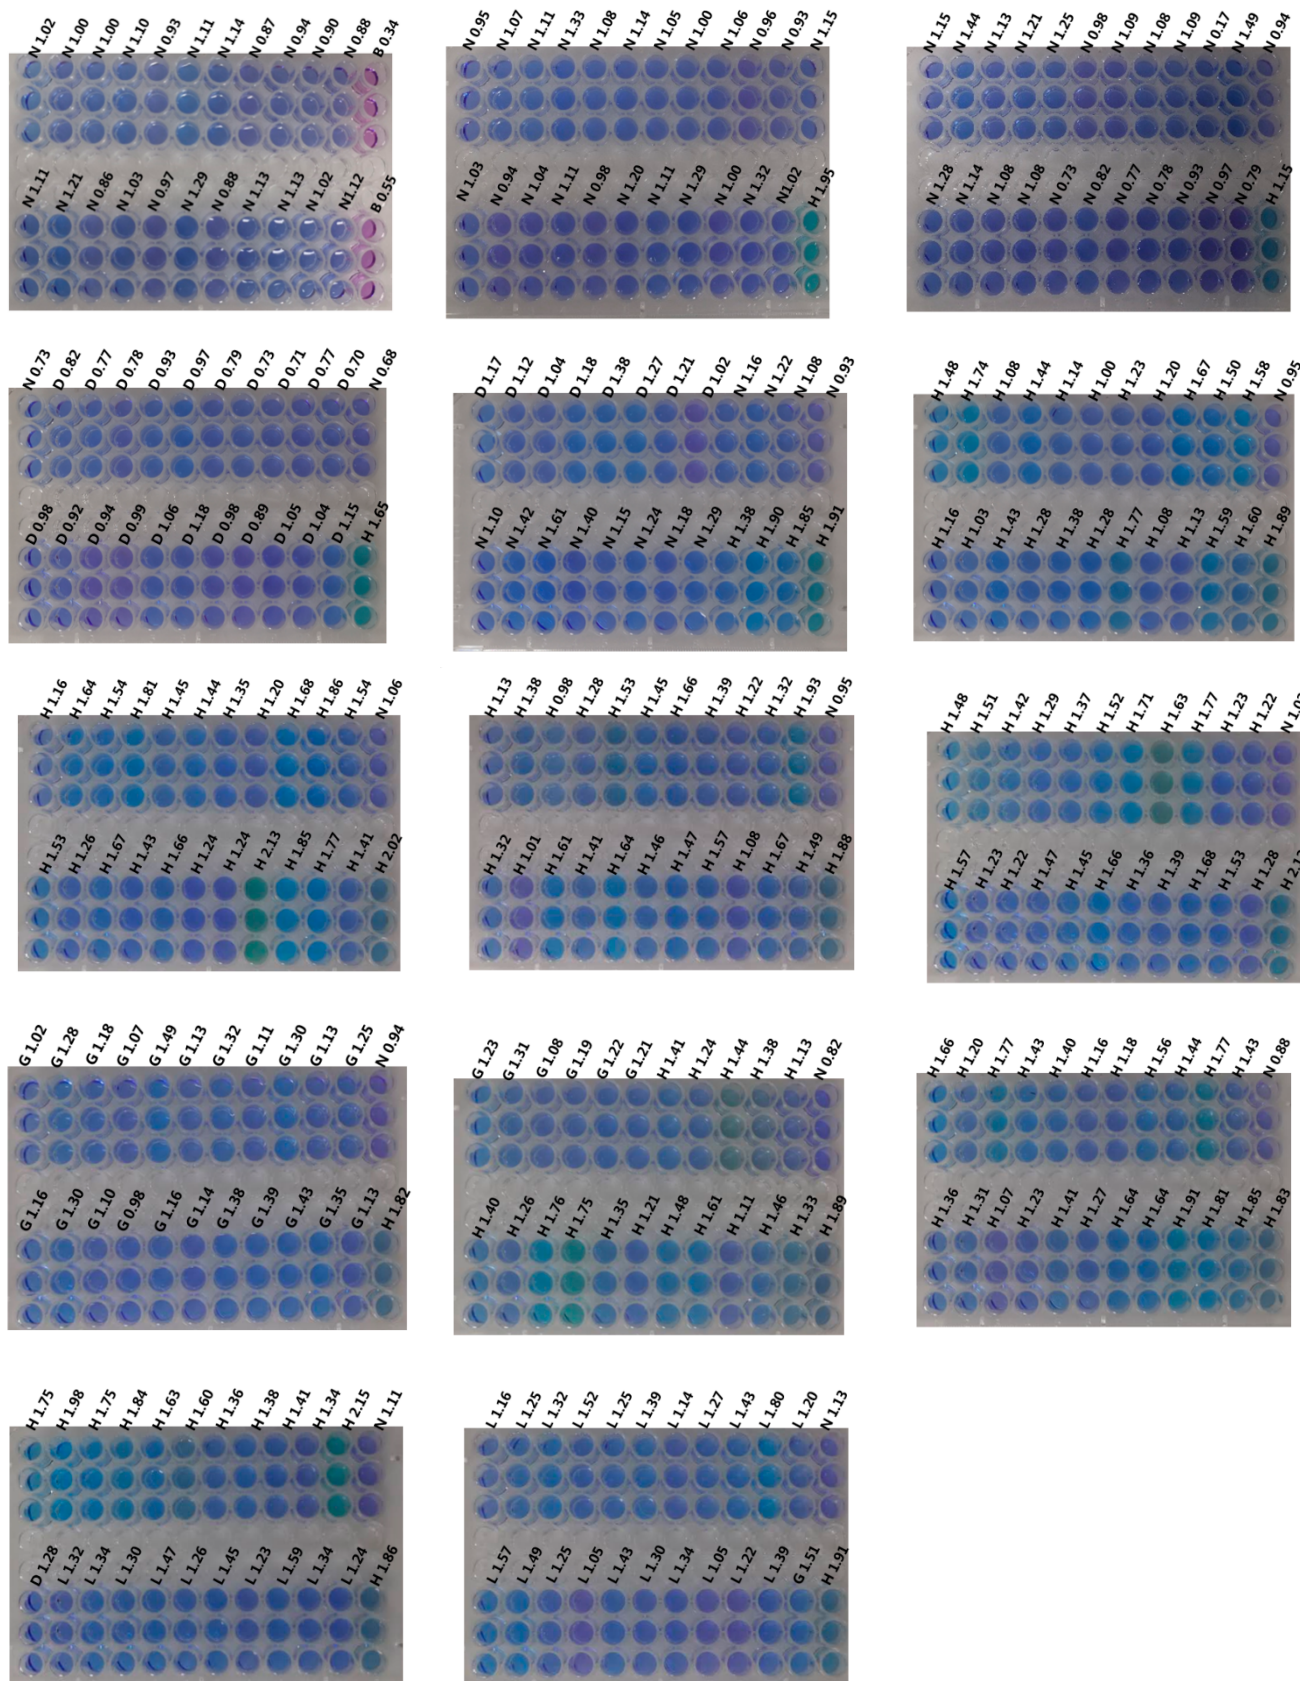

L = Lung, H = Hepatic, N = Normal, G = Gastrointestinal, D = Diabetes and B = Blank tests.
